# Supplementary material for: Alterations in HLA Class I-Presented Immunopeptidome and Class I-Interactome upon Osimertinib Resistance in EGFR Mutant Lung Adenocarcinoma
Source: MDPI journal article supplement (doi:10.3390/cancers13194977), 2021-10-04

Supplementary Figure 1

a

| Cell line  | Database | Accession ID |
|------------|----------|--------------|
| H1975      | ATCC     | CRL-5908     |
| PC9        | MSKCC    | N.A.         |
| H1975-OsiR | In-house | N.A.         |
| PC9-OsiR   | In-house | N.A.         |

b

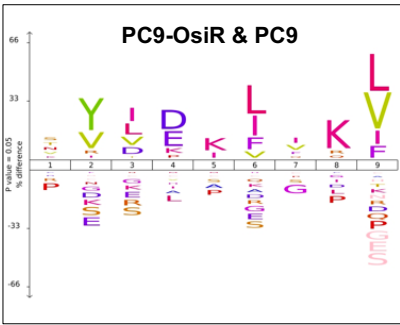

c

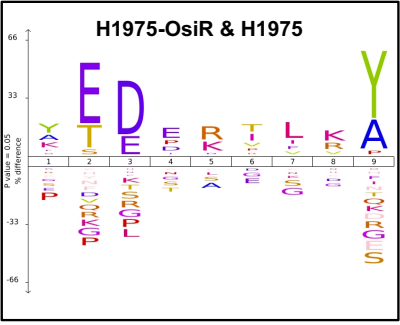

d

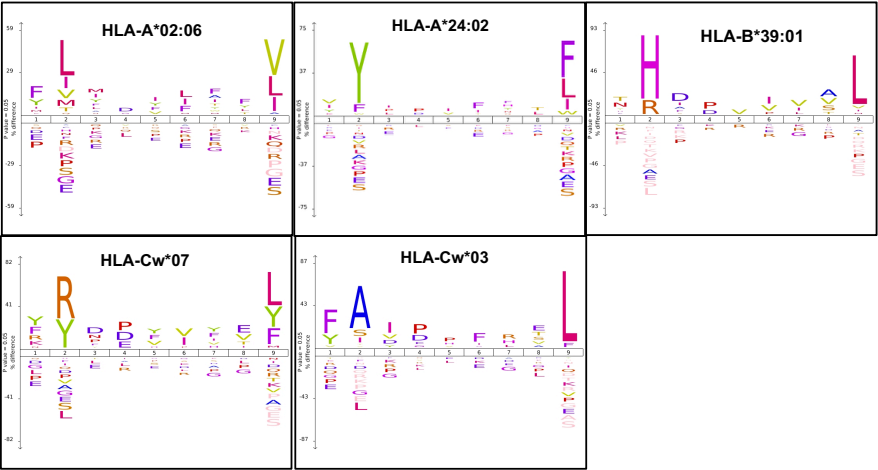

e

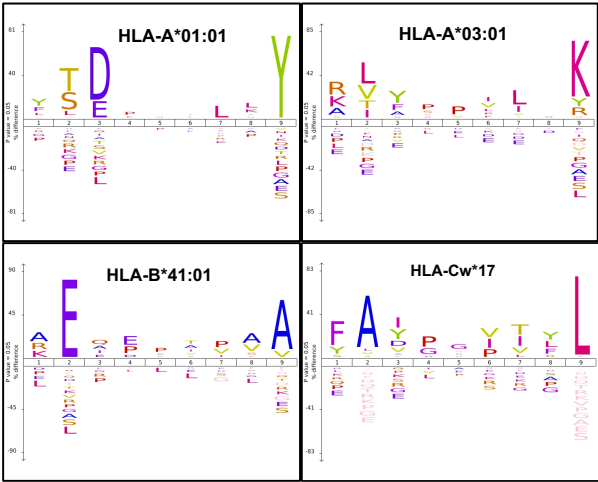

Supplement: s1 [file s1]
