# Supplementary figures and images for: Alterations in HLA Class I-Presented Immunopeptidome and Class I-Interactome upon Osimertinib Resistance in EGFR Mutant Lung Adenocarcinoma
Source: MDPI journal article supplement (doi:10.3390/cancers13194977), 2021-10-04

Supplementary Figure 3

a

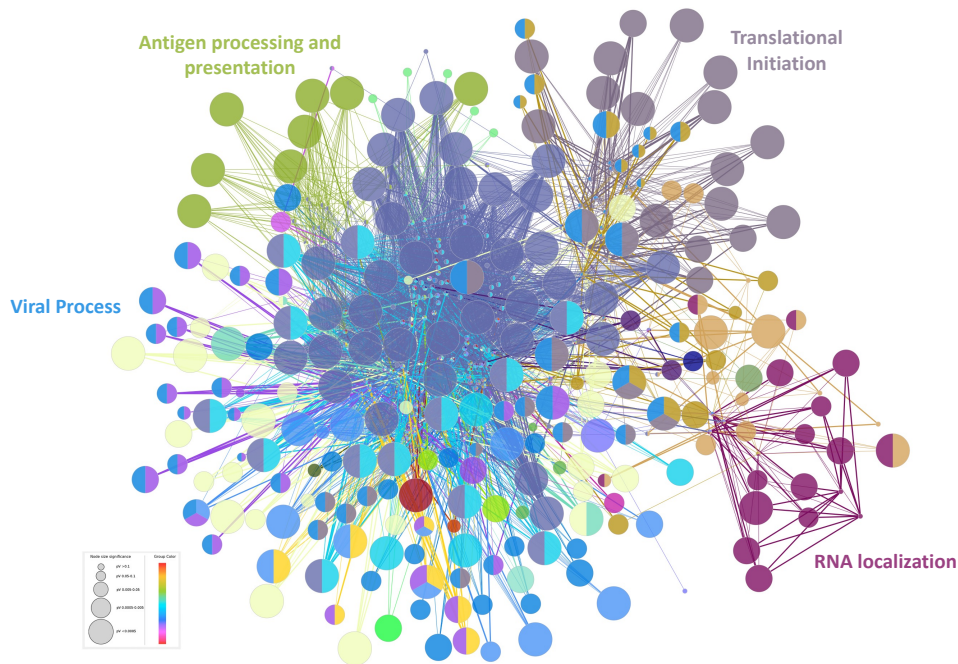

b

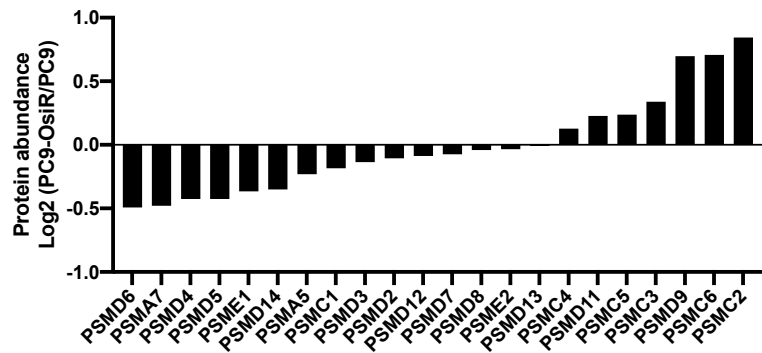

Supplement: s1 [file s1]

## Supplementary Figure 2

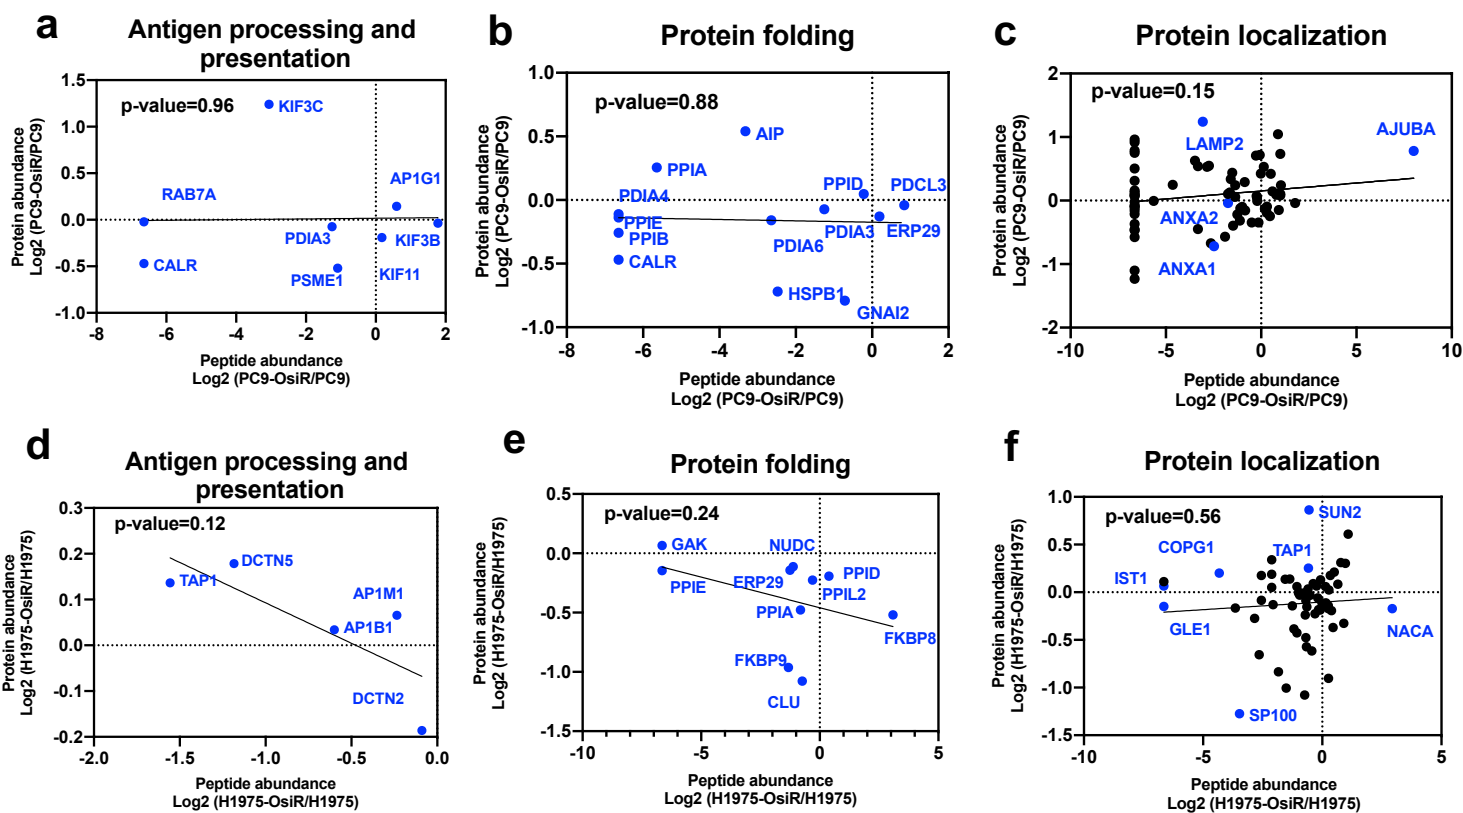

Supplement: s1 [file s1]
